# Supplementary material
Source: PubMed Central journal article supplement (PMC6890994)
Supplement: mBio.02790-19-sf001.pdf [file mBio.02790-19-sf001.pdf]

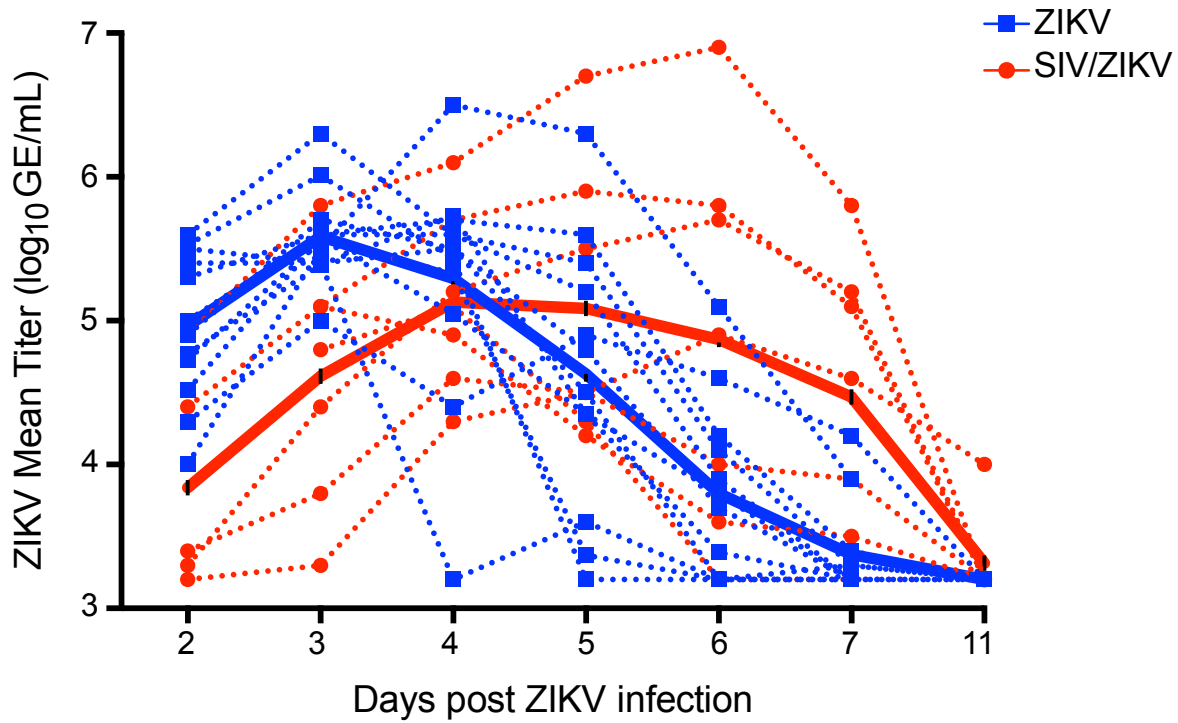

**Fig. S1**

**ZIKV plasma viral titer**

Dotted lines represent titers for individual animals, while solid lines represent the mean viral titer for the ZIKV cohort (blue, n=12) and the SIV/ZIKV cohort (red, n=7).
