# Supplementary material
Source: PubMed Central journal article supplement (PMC6890994)

### Fig. S2. Representative flow cytometry gating for cell sorting of peripheral lymph nodes

Parent gating strategy for the flow cytometric sorting of day 5 and day 27 post-ZIKV infection LN samples for analysis of cellular infection status by RT-PCR. A representative staining profile from the ZIKV cohort is shown. Live, singlet leukocytes were sorted into B cell ( $CD20^+$ ,  $CD3^-$ ,  $CD11b^-$ ), T cell ( $CD3^+$ ), or macrophage ( $CD11b^+$ ,  $CD3^-$ ) populations.

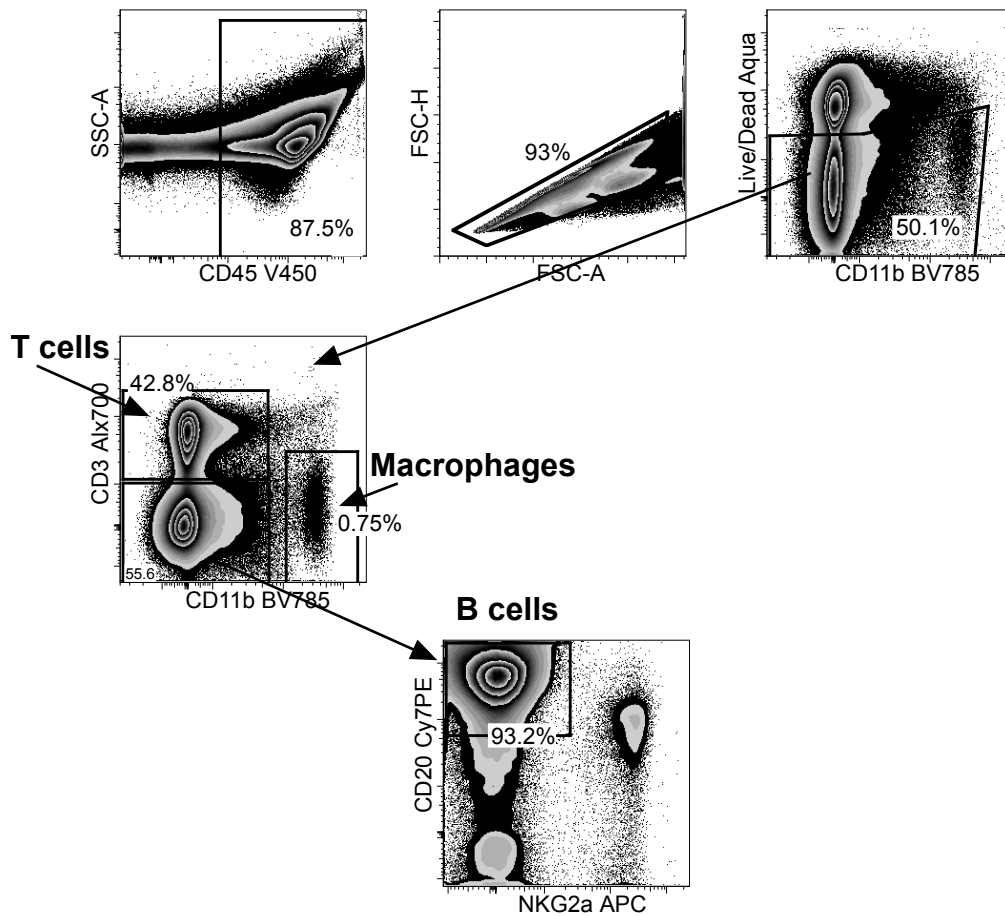

Supplement: mBio.02790-19-sf002.pdf [file mBio.02790-19-sf002.pdf]
