# Supplementary material
Source: PubMed Central journal article supplement (PMC6890994)

### Fig. S3. Representative flow cytometry gating for phenotypic cell characterization

Parent gating strategy for the analysis of PBMCs. A representative staining profile from the ZIKV cohort is shown. Live, singlet lymphocytes were phenotypically characterized as memory B cells ( $CD27^+$ ,  $CD20^+$ ,  $CD3^-$ ,  $CD11b^-$ ), memory  $CD4^+$  T cells ( $CD28^{+/-}$ ,  $CD95^+$ ,  $CD4^+$ ,  $CD3^+$ ), memory  $CD8^+$  T cells ( $CD28^{+/-}$ ,  $CD95^+$ ,  $CD4^+$ ,  $CD3^+$ ), or NK cells ( $NKG2a^+$ ,  $CD3^-$ ,  $CD11b^-$ ). Proliferation was assessed for each cell type by the expression of Ki67.

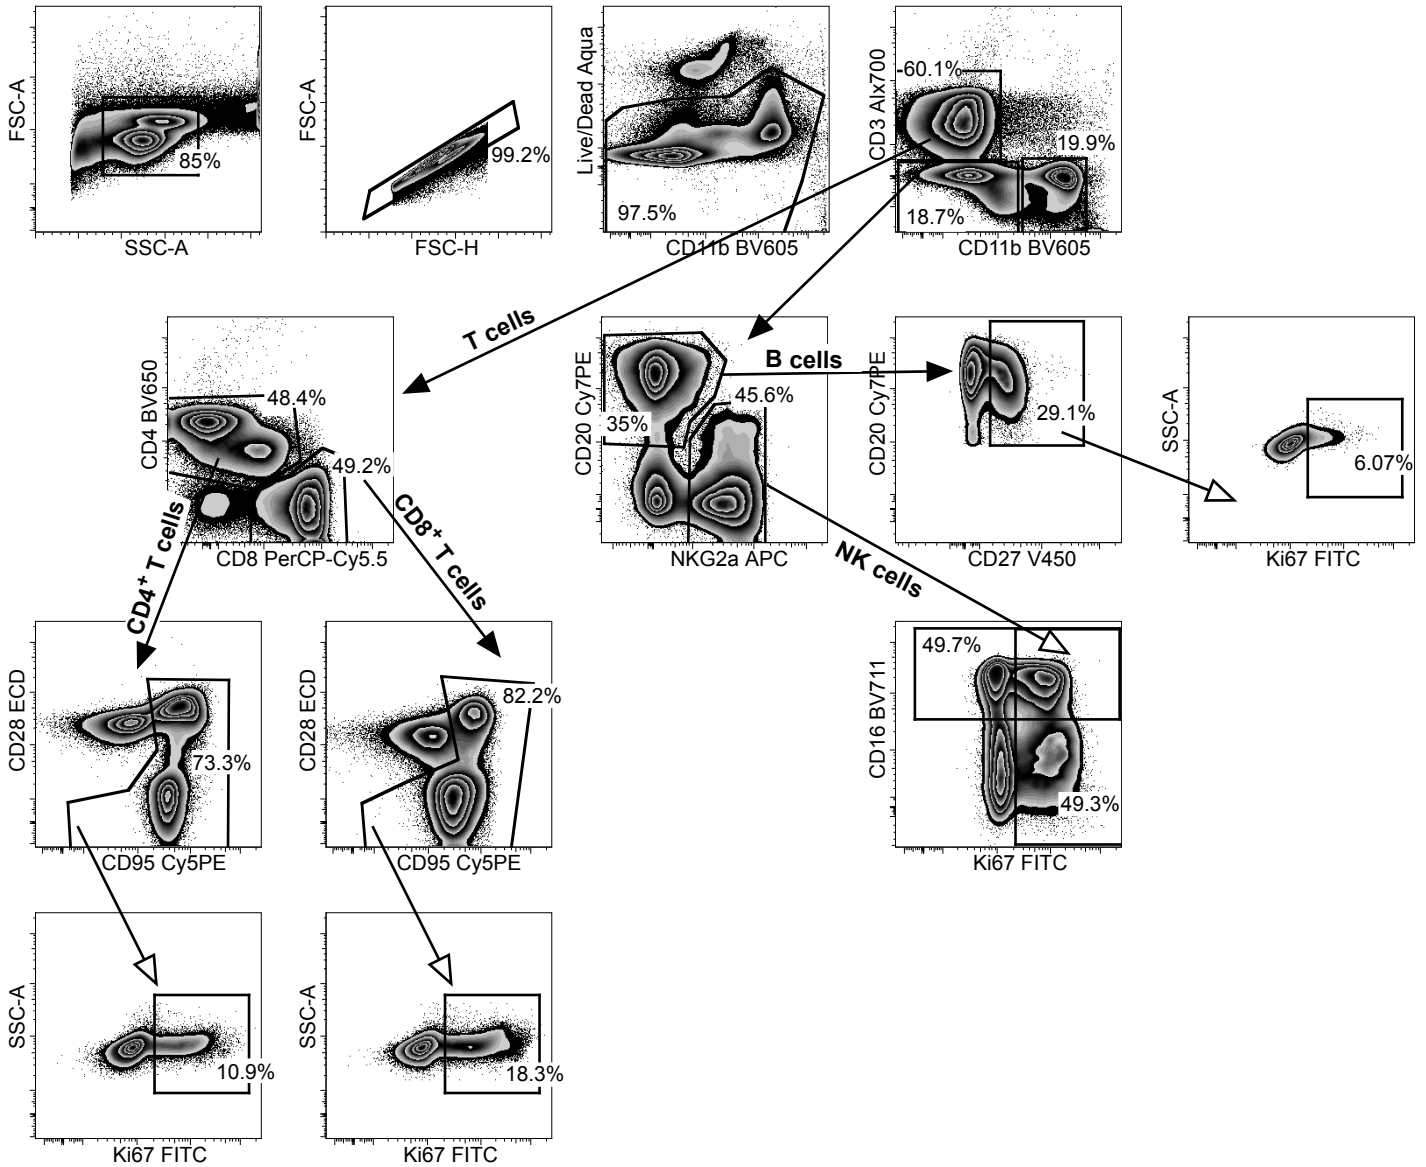

Supplement: mBio.02790-19-sf003.pdf [file mBio.02790-19-sf003.pdf]
