# Supplementary material
Source: PubMed Central journal article supplement (PMC6890994)
Supplement: mBio.02790-19-sf004.pdf [file mBio.02790-19-sf004.pdf]

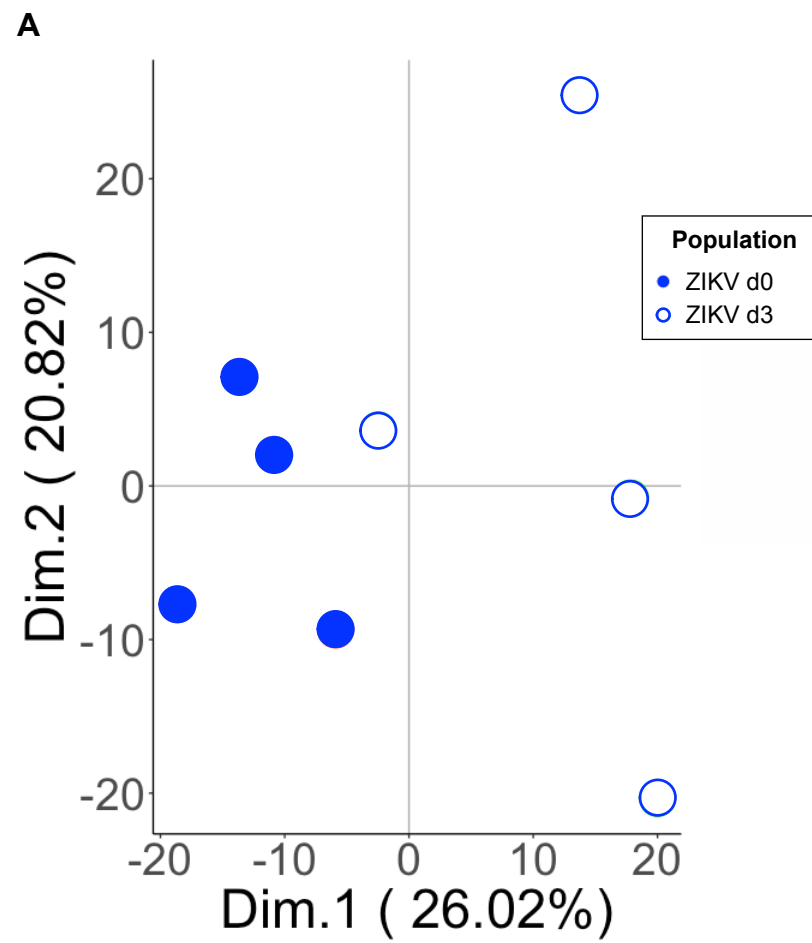

**B**

| Predicted Pathways                                           | z-score |
|--------------------------------------------------------------|---------|
| Cytotoxic T Lymphocyte-mediated Apoptosis of Target Cells    | 2.67    |
| T Cell Exhaustion Signaling Pathway                          | 2.56    |
| Granzyme B Signaling                                         | 2.00    |
| Activation of IRF by Cytosolic Pattern Recognition Receptors | 1.86    |
| Interferon Signaling                                         | 1.40    |
| Synaptogenesis Signaling Pathway                             | -2.35   |
| CCR3 Signaling in Eosinophils                                | -2.40   |
| Fc Epsilon RI Signaling                                      | -2.50   |
| Gα12/13 Signaling                                            | -2.61   |
| GP6 Signaling Pathway                                        | -2.67   |

**Fig. S4**  
**Transcriptional gene profiling of expression changes in acute ZIKV infection**  
 Immunology panel gene expression profiling in ZIKV RM cohort (n=4) at day 0 (closed, blue circles) or day 3 (open, blue circles). (A) Principal Component Analysis comparing the two sample groups. The plot represents clustering of the data in a 2-dimensional matrix. Each dot represents one RM. (B) Pathway activation determined by z-score. The top five pathways predicted to be activated (orange) or deactivated (blue) are displayed.
