# Supplementary material
Source: PubMed Central journal article supplement (PMC6890994)
Supplement: mBio.02790-19-st001.pdf [file mBio.02790-19-st001.pdf]

**Table S1: Transcriptional gene expression differences between SIV/ZIKV and ZIKV cohorts at day 0.**

| Gene          | P-value          | Gene    | P-value    | Gene   | P-value    | Gene      | P-value    | Gene    | P-value    |
|---------------|------------------|---------|------------|--------|------------|-----------|------------|---------|------------|
| IFIT3         | 7.93E-07         | IL8     | 0.00185425 | SOCS3  | 0.00776406 | CEBPB     | 0.02102771 | TNFSF8  | 0.03507764 |
| MX2           | 1.09E-05         | BCL2    | 0.00191256 | CCL15  | 0.00839043 | ERCC3     | 0.02130836 | ICAM3   | 0.0356639  |
| IFIT2         | 1.52E-05         | ITGA5   | 0.00191325 | GATA3  | 0.00839658 | MAP2K6    | 0.02147307 | LILRA1  | 0.03630455 |
| DDX58         | 4.02E-05         | CXCL2   | 0.00198958 | HIF1A  | 0.00903545 | BCL2L1    | 0.02202058 | IKZF3   | 0.03651656 |
| OAS3          | 4.29E-05         | MX1     | 0.00207775 | ZEB1   | 0.00917716 | SMAD2     | 0.02212702 | MAP4K1  | 0.03655876 |
| CD69          | 5.69E-05         | HMGB2   | 0.0020842  | HSH2D  | 0.00942043 | C1QA      | 0.02232437 | ARG2    | 0.03673869 |
| OASL          | 6.32E-05         | IL17F   | 0.00219692 | PTGER4 | 0.00968557 | KIR3DL1   | 0.02254675 | MUC1    | 0.03716127 |
| OAS2          | 8.03E-05         | IL29    | 0.00251279 | HDAC3  | 0.01014305 | MALT1     | 0.02287207 | S1PR1   | 0.03724694 |
| IRF7          | 8.30E-05         | TGFB1   | 0.00279976 | KLRF2  | 0.01046651 | CFH       | 0.02349279 | KEAP1   | 0.03726927 |
| IL1B          | 1.92E-04         | TIGIT   | 0.00314132 | TFRC   | 0.01102595 | TRIM39    | 0.02392435 | IL18R1  | 0.03734216 |
| CD38          | 2.78E-04         | OAZ1    | 0.00317684 | CCR4   | 0.01118128 | NFKB1     | 0.02397283 | APP     | 0.03808552 |
| IFIT1         | 2.96E-04         | IL7R    | 0.00349463 | IFI16  | 0.01123116 | LGALS3    | 0.02402125 | PTGER3  | 0.0385113  |
| EIF2AK2       | 3.19E-04         | CR1     | 0.00356323 | S100A8 | 0.01242334 | CD28      | 0.02408802 | ALOX5   | 0.03856463 |
| STAT2         | 3.34E-04         | NOD2    | 0.00410379 | ATM    | 0.01251319 | TBP       | 0.02448238 | CR2     | 0.03870995 |
| CD46          | 4.06E-04         | XCR1    | 0.00455686 | SLAMF6 | 0.01251377 | MYD88     | 0.0266978  | CD44    | 0.03920334 |
| IFIH1         | 4.10E-04         | PSMB9   | 0.00472382 | LTB    | 0.01311223 | RRAD      | 0.0271897  | NFATC1  | 0.03950388 |
| OAS1          | 5.14E-04         | IRAK2   | 0.00494961 | ITGB1  | 0.01367477 | TRAF3     | 0.02724744 | HAVCR2  | 0.04034833 |
| PML           | 5.21E-04         | MAVS    | 0.00527007 | MEF2B1 | 0.01413425 | PECAM1    | 0.02757925 | CFL1    | 0.0408834  |
| NFKB1         | 5.60E-04         | LILRA5  | 0.00530037 | CD14   | 0.01451991 | MAF       | 0.02778087 | IL28A   | 0.04123495 |
| ISG20         | 6.76E-04         | ITGA6   | 0.00622237 | AICDA  | 0.01467147 | CCRL2     | 0.02887235 | CD70    | 0.04129452 |
| IFI44         | 7.18E-04         | MAP2K4  | 0.00625145 | ILF3   | 0.01478905 | GBP1      | 0.02917473 | ICOSLG  | 0.04228733 |
| DUSP4         | 9.05E-04         | TMEM173 | 0.00626582 | MAFG   | 0.01630849 | SELL      | 0.0291879  | IL4R    | 0.04254352 |
| SOCS1         | 9.29E-04         | CXCL3   | 0.00627785 | CXCL11 | 0.01678782 | PLAUR     | 0.02922652 | TNFAIP3 | 0.04325647 |
| AREG          | 9.87E-04         | NFIL3   | 0.0063273  | GNAQ   | 0.01693159 | MAPK8     | 0.03039964 | LEF1    | 0.0452134  |
| MYC           | 0.00135508       | S100A9  | 0.00636808 | CD40LG | 0.01695871 | C5aR1     | 0.03044066 | GPI     | 0.04564313 |
| ICAM1         | 0.00135726       | FCGR2B  | 0.00640027 | MAPK11 | 0.01717784 | CTSS      | 0.03130193 | REPS1   | 0.04572988 |
| STAT1         | 0.0015054        | ELK1    | 0.00649406 | XCL1   | 0.0174587  | FN1       | 0.03167918 | IL17RA  | 0.04616199 |
| PTGS2         | 0.00155337       | SIGLEC1 | 0.00659993 | TBK1   | 0.01833773 | IL11RA    | 0.03192796 | CCR2    | 0.04639127 |
| AKT3          | 0.00169654       | ICAM2   | 0.00666474 | CTLA4  | 0.01991675 | NFKBIA    | 0.03326025 | NFKB2   | 0.04649365 |
| CD55          | 0.00172968       | TLR9    | 0.00706013 | JAK2   | 0.01999702 | LILRA4    | 0.03381307 | FADD    | 0.04668772 |
| GZMA          | 0.00173024       | GPR183  | 0.00738519 | CTNNA1 | 0.02065869 | FLT3LG    | 0.03391652 | CASP10  | 0.04694446 |
| <b>CXCL10</b> | <b>0.0017323</b> | NR3C1   | 0.00742742 | TAP1   | 0.02076268 | BST2      | 0.03418808 |         |            |
| DPP4          | 0.001739         | IFI35   | 0.00761801 | MAP4K4 | 0.02101723 | TNFRSF13B | 0.03421173 |         |            |
